# Supplementary material for: Glioblastoma invasion and cooption depend on IRE1α endoribonuclease activity
Source: PubMed Central journal article supplement (PMC4694804; doi:10.18632/oncotarget.4679), 2015-07-23
Supplement: oncotarget-06-24922-s001.pdf [file oncotarget-06-24922-s001.pdf]

## SUPPLEMENTARY FIGURES AND TABLE

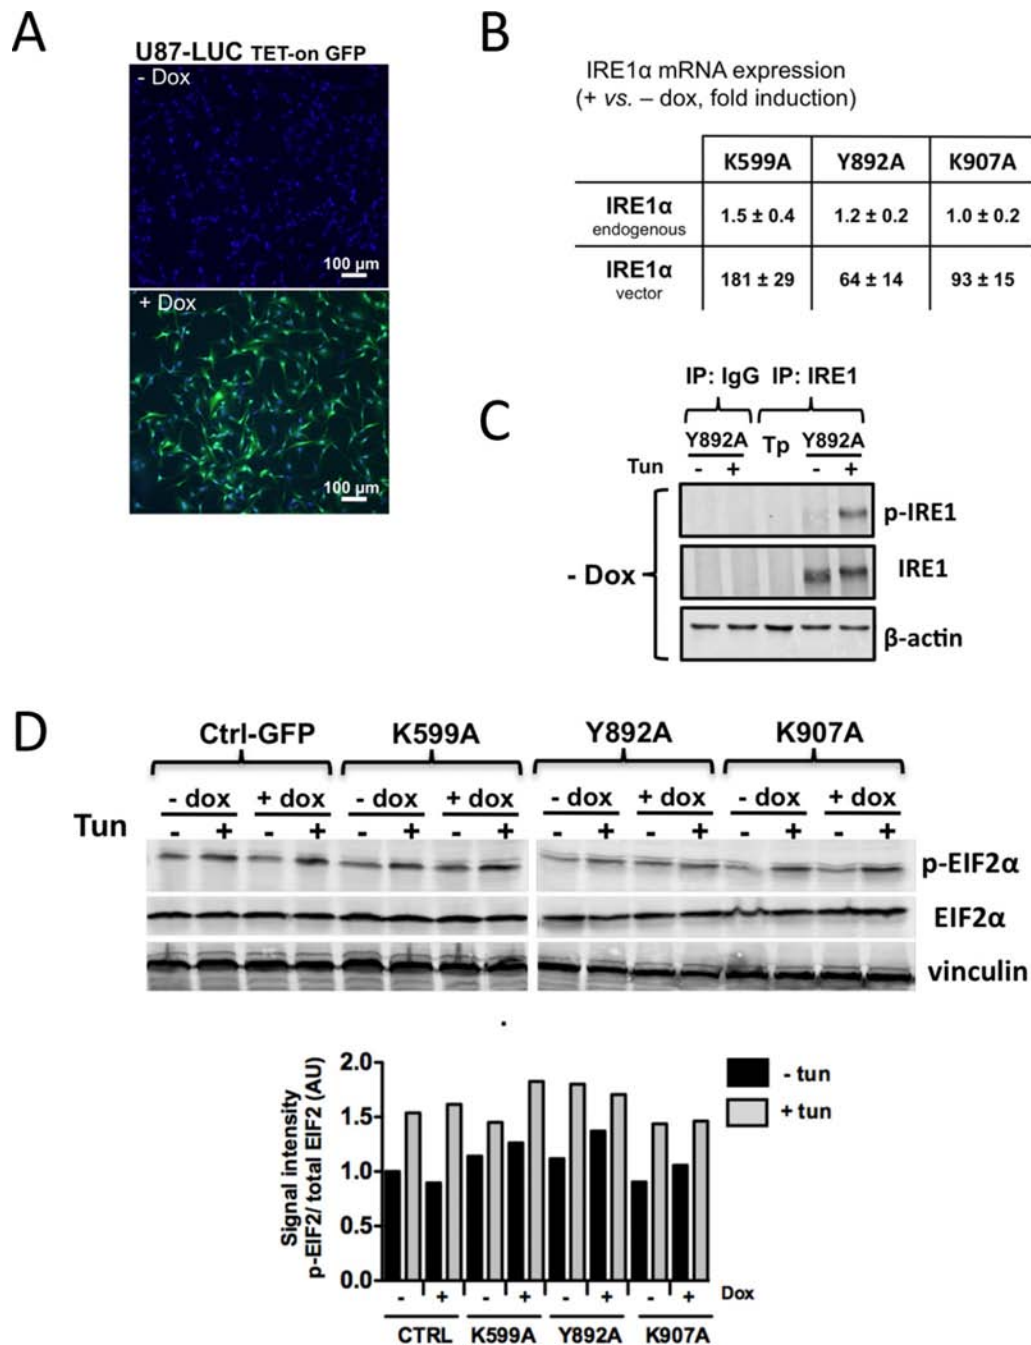

**Supplementary Figure S1: Characterization of IRE1 $\alpha$  mutants.** **A.** U87-LUC cells were transduced with the lentiviral vector containing the GFP sequence (U87-LUC Tet-ON GFP). Cells were grown for 48 h with (+Dox) or without (-Dox) doxycycline and photographed. **B.** U87-Y892A, U87-K599A and U87-K907A cells were grown for 2 days with or without doxycycline, and the expression of endogenous or ectopic IRE1 $\alpha$  transcripts was measured by using RT-PCR and expressed as fold-induction (+) dox vs. (-) dox. **C.** U87-Y892A, U87-K599A and U87-K907A cells were grown without doxycycline and were stimulated with or without tunicamycin for 2 h. IRE1 $\alpha$  protein was immunoprecipitated from cellular extracts using anti-IRE1 $\alpha$  antibodies (IP: IRE1) or using non-specific rabbit IgG (IP: IgG). Same experiment was performed in the absence of antibodies (Tp). Phospho-(Ser724)-IRE1 $\alpha$  (p-IRE1), total IRE1 $\alpha$  (IRE1) and  $\beta$ -actin were revealed by immunoblotting. **D.** U87 Tet-on GFP, U87-K599A, U87-Y892A and U87-K907A cells were grown in the absence (-dox) or presence (+dox) of doxycycline. They were then stimulated with (+) or without (-) tunicamycin for 2 h and subsequently subjected to an immunoblot by using antibodies against phosphorylated Ser-51 eIF2 $\alpha$  (p-eIF2 $\alpha$ ), total eIF2 $\alpha$  or vinculin as internal loading control. Upper panel: Western blot analysis; lower panel: quantification of the ratio p-IRE1 $\alpha$ /IRE1 $\alpha$  relative to vinculin.

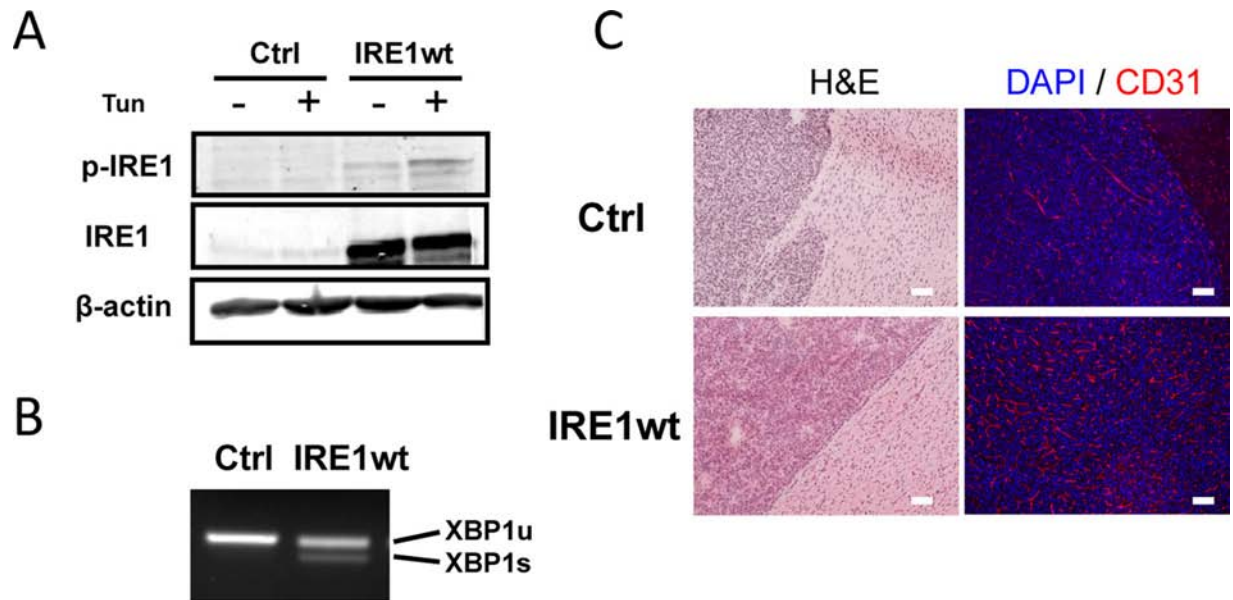

**Supplementary Figure S2: Ectopic expression of IRE1wt protein does not affect significantly the angiogenic and non-invasive characteristics of U87 cell-derived gliomas.** Control tumor cells and cells over-expressing the IRE1wt protein were implanted intracerebrally in mice. A) High expression of IRE1 in U87 cells after transduction of the wild-type IRE1 (IRE1wt) gene. Western blot analysis of total IRE1 (IRE1) and of phospho-Ser724-IRE1 (p-IRE1). B) XBP1 splicing was increased in U87 cells overexpressing IRE1wt. XBP1u, unspliced mRNA; XBP1s, spliced mRNA. C) H&E staining (left panels) and CD31 labeling (right panels) were carried out on coronal sections of the brain tumors (Ctrl: tumors bearing the empty vector; IRE1wt, tumors over-expressing the IRE1 wild-type protein). Bars: 100  $\mu$ m.

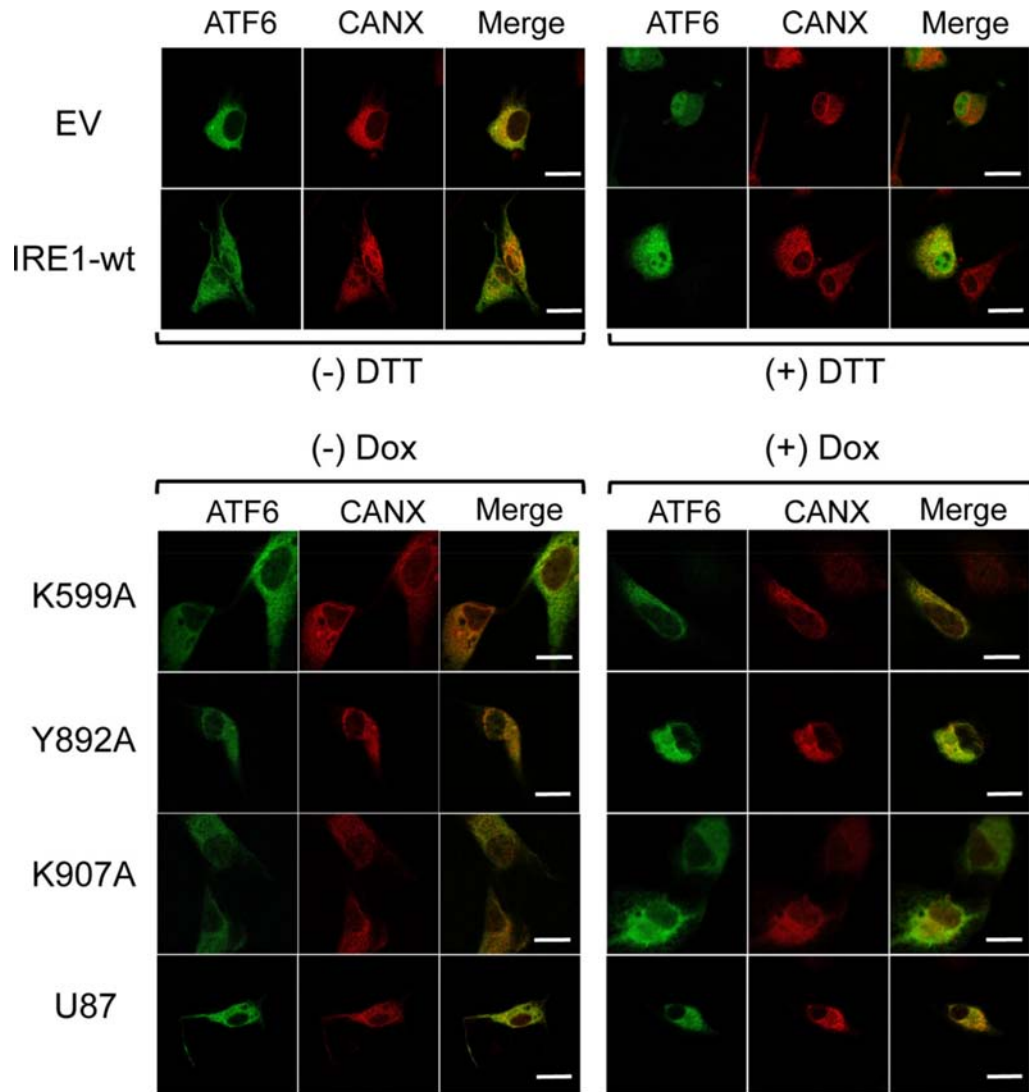

**Supplementary Figure S3: ATF6 $\alpha$  activation assay.** Cells expressing the different IRE1 $\alpha$  mutants or the IRE1wt protein were transfected with FLAG-ATF6 $\alpha$  plasmid for 24 h and incubated in the presence or absence of doxycycline (Dox) with 1 mM DTT for three hours, as indicated. Cells were then immunostained using anti-FLAG (ATF6 $\alpha$ ; green labeling) and anti-CANX (endoplasmic reticulum; red labeling) antibodies and were analyzed by confocal microscopy. Bars: 10  $\mu$ m.

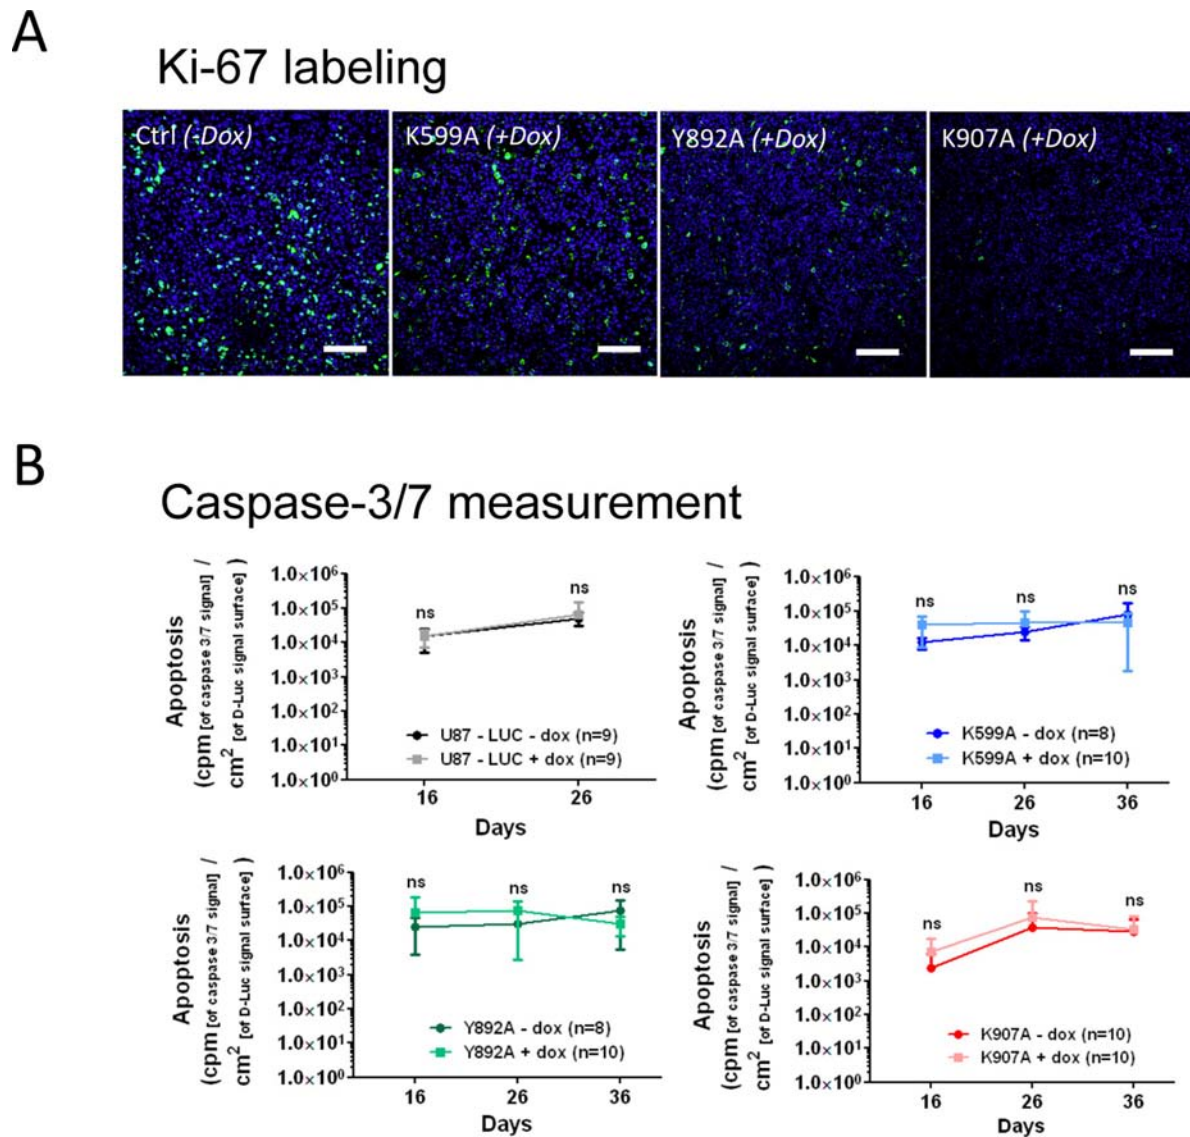

**Supplementary Figure S4: Decreased proliferation rate in IRE1 $\alpha$  mutants.** A. Proliferation index of implanted U87-K599A, U87-Y892A and U87-K907A gliomas with or without doxycycline (see also Figure 3D). Tumors were immunostained using antibodies anti-Ki-67. (Scale bars: 100  $\mu$ m). B. Real-time bioluminescence imaging of apoptosis in mice bearing U87-LUC, U87-K599A, U87-Y892A and U87-K907A gliomas. Apoptosis was monitored after intraperitoneal injection of the caspase-3/7 synthetic substrate (Z-DEVD-aminoluciferin) one day before tumor measurement (injection of D-luciferin; days 16, 26 and 36). Bioluminescence intensity of apoptosis (in cpm) was normalized to that of tumor size (in cm<sup>2</sup>). n, number of mice. Statistical analysis represents means values  $\pm$  SD. (ns,  $P > 0.05$ ).

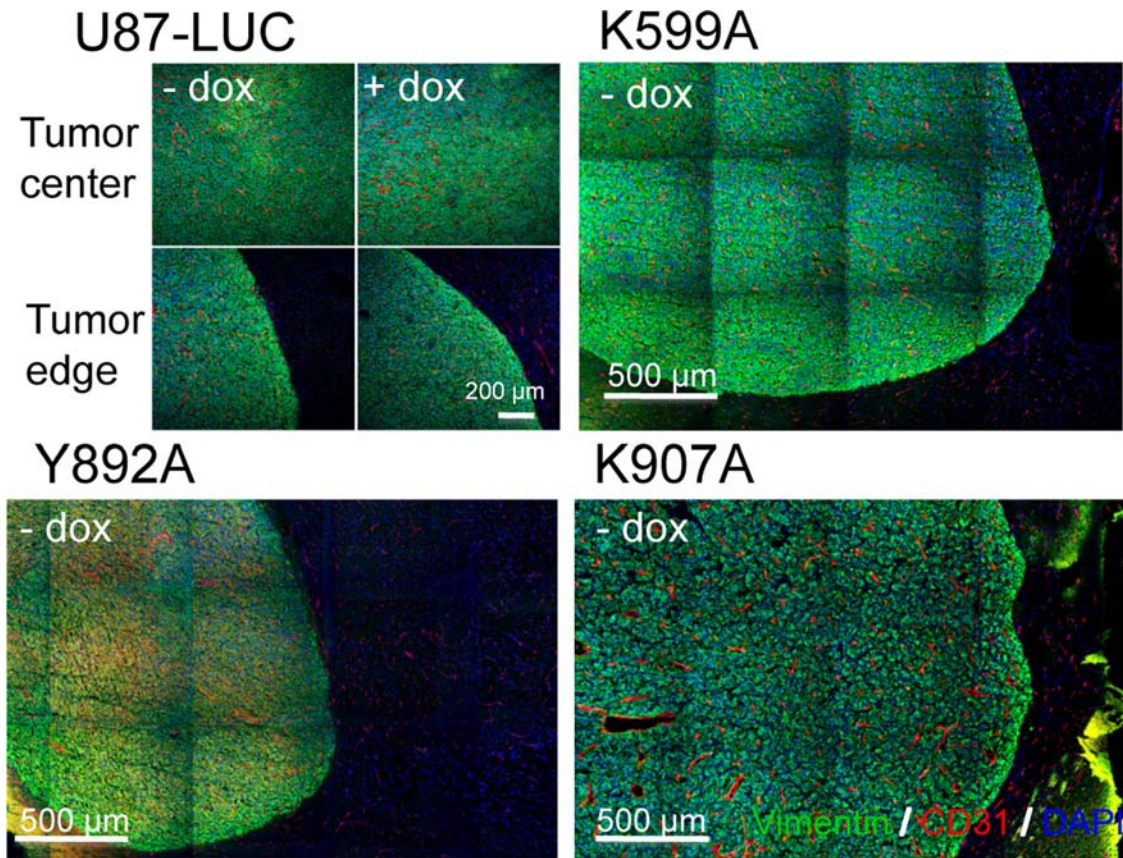

**Supplementary Figure S5: Control U87-gliomas are angiogenic and non-infiltrative.** Coronal sections were obtained from U87-LUC, U87-K599A, U87-K907A and U87-Y892A tumors in the absence of doxycycline (see also figure 3). Immunolabeling was performed using anti-vimentin (tumor cells) and anti-CD31 (blood vessels) antibodies. Microphotographs are representative of at least 5 brain tumors analyzed for each condition.

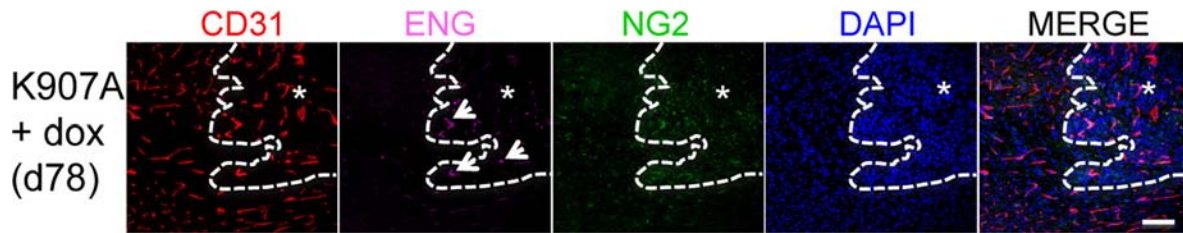

**Supplementary Figure S6: Long-lasting avascular phenotype with vessel co-option in gliomas deficient for IRE1 $\alpha$ .** U87-K907A tumors were grown for 78 days with doxycycline and were immunostained against CD31, ENG and NG2. Arrows point to the presence of rare angiogenic vessels among co-opted vessels into the glioma tissue. Asterisks localize tumor tissue delimited by the dashed line.

**Supplementary Table S1. Primers used in this study**

| gene           | forward primer (5' - > 3') | reverse primer (5' - > 3') |
|----------------|----------------------------|----------------------------|
| $\beta$ -actin | CGTACCACTGGCATCGTGAT       | GTGTTGGCGTACAGGTCTTT       |
| HPRT1          | CCAGACAAGTTTGTGTAGG        | TCCAAACTCAACTTGAAGTC       |
| COL1A1         | TCCCGCCGGTCAAGATGGTC       | CGGGCTCTCCAGCAGCACCT       |
| DCN            | GGGAGCTTCACTTGGACAACAAC    | GGGCAGAAGTCACTTGATCCAAC    |
| LAMA4          | GCAGTCCCCAGTCCCGAACG       | GGCTGCGCAACCAGCAGAGT       |
| LAMC1          | GCCGTGGAGGAGGGCAACTG       | CCCCATGGCCAGTGGAACG        |
| COL5A1         | CTGCTGCTGCTGCTGTGG         | GCGCAAAAGCCTGTTGTCT        |
| COL3A1         | GGAGCTGGCTACTTCTCGC        | GGGAACATCCTCCTTCAACAG      |
| MIST1          | CGGACAAGAAGCTCTCCAAG       | CTGGACATGGTCAGGATGGT       |
| LOX            | ATGTTGTGCGCTGTGACATT       | TTCAGAACACCAGGCACTGA       |
| THBS-1         | TGCCTGATGACAAGTTCCAAG      | CCAGAGTGGTCTTTCCGCTC       |
| XBP1           | CTGGAACAGCAAGTGGTAGA       | CTCCTCCAGGCTGGCAGG         |
